# Supplementary material for: Physiological changes and transcript identification in Coreopsis tinctoria Nutt. in early stages of salt stress
Source: PeerJ. 2021 Aug 9;9:e11888. doi: 10.7717/peerj.11888 (PMC8359800; doi:10.7717/peerj.11888)
Supplement: Supplemental Information 14 [file peerj-09-11888-s014.xls]

## Sheet: Figure 1 A-H
		nmol/g	μg/g	mg/g	mg/g	μg/g	ng/g	μg/g	μg/g	μg/g
		MDA	pro	S-suger	S-protein	POD	CAT	CAT	SOD	APX
CK	0	31.2158	0.985591	2.15045	7.26844	0.0542467	1244.77	1.24477	0.772103	0.14282
CK	0	32.8641	0.980851	2.18794	7.28049	0.0469953	1311.71	1.31171	0.763768	0.131878
CK	0	32.1391	0.987565	2.16808	7.25639	0.0559874	1274.59	1.27459	0.760022	0.138521
50-1	1	38.3656	0.99512	2.10055	7.82309	0.0525914	1150.28	1.15028	0.806824	0.157474
50-1	1	40.5961	0.99056	2.14481	7.87352	0.0543705	1153.89	1.15389	0.807439	0.160006
50-1	1	34.9247	0.98513	2.13748	7.93708	0.0501437	1182.13	1.18213	0.800843	0.158785
50-2	2	39.4555	1.07556	2.36967	7.59591	0.0631398	1212.39	1.21239	0.642236	0.156953
50-2	2	42.02	1.00942	2.37512	7.4023	0.065	1261.4	1.2614	0.649582	0.149268
50-2	2	41.01	1.02429	2.37715	7.4857	0.064	1250.6	1.2506	0.644291	0.148551
50-4	3	70.5977	1.36394	2.79294	11.4982	0.0670008	1504.1	1.5041	0.731357	0.127479
50-4	3	69.1527	1.38614	2.70765	12.0077	0.0679913	1468.12	1.46812	0.730553	0.128817
50-4	3	57.8554	1.39143	2.71436	11.8074	0.0660901	1478.39	1.47839	0.709411	0.127223
50-5	4	68.6542	1.4088	2.4597	8.9414	0.0568751	1567.58	1.56758	0.74523	0.129794
50-5	4	61.1751	1.3628	2.45683	8.90631	0.0650712	1572.51	1.57251	0.75555	0.121292
50-5	4	67.5094	1.35392	2.48649	9.01387	0.0599951	1567.91	1.56791	0.7611	0.118626
200-1	5	43.6986	1.23808	2.81156	11.968	0.0695208	1675.56	1.67556	0.711093	0.124763
200-1	5	43.1262	1.29424	2.80672	11.8871	0.0703816	1670.47	1.67047	0.709938	0.124112
200-1	5	52.9329	1.282	2.80821	11.8754	0.0705149	1725.82	1.72582	0.651169	0.130605
200-2	6	70.4095	1.43324	2.80952	10.7234	0.072452	1588.54	1.58854	0.709925	0.126888
200-2	6	80.9412	1.41813	2.86774	10.7116	0.0701455	1576.6	1.5766	0.70101	0.117749
200-2	6	78.2701	1.44341	2.88626	10.8843	0.0690331	1505.38	1.50538	0.74967	0.12579
200-4	7	92.5795	1.87401	2.976	11.8432	0.0752483	1550.35	1.55035	0.578653	0.0812362
200-4	7	91.0531	1.70589	2.96017	11.5275	0.0669036	1517	1.517	0.584664	0.081697
200-4	7	90.2477	1.76981	3.01937	11.6659	0.0634865	1632.48	1.63248	0.569193	0.0806199
200-5	8	86.0599	2.06835	3.01539	11.0972	0.0716331	1600.78	1.60078	0.492838	0.080133
200-5	8	83.8991	2.07179	3.10169	11.2116	0.0713891	1539.48	1.53948	0.500708	0.077199
200-5	8	89.9215	2.09777	3.08683	11.0592	0.0758388	1532.31	1.53231	0.502947	0.0862211
	MDA content（nmol/g·FW）	SD	LSD	Pro content(μg/g·FW）	SD	LSD	S-suger content(mg/g·FW）	SD	LSD	S-protein content(mg/g·FW）	SD	LSD	POD content(μg/g·FW）	SD	LSD	CAT content(μg/g·FW）	SD	LSD	SOD content(μg/g·FW）	SD	LSD	APX content(μg/g·FW）	SD	LSD
ck	32.073	0.826	a	0.985	0.004	a	2.169	0.019	a	7.268	0.012	a	0.052	0.005	a	1.277	0.034	b	0.765	0.006	f	0.138	0.006	c
FS-1	37.962	2.857	ab	0.99	0.005	a	2.128	0.023	a	7.878	0.057	c	0.052	0.002	a	1.162	0.017	a	0.805	0.003	g	0.159	0.001	d
FS-2	40.829	1.292	bc	1.036	0.035	a	2.374	0.004	b	7.495	0.097	b	0.064	0.001	bc	1.241	0.026	b	0.645	0.004	c	0.152	0.005	d
FS-3	65.869	6.978	d	1.38	0.014	c	2.738	0.047	d	11.771	0.257	g	0.067	0.001	cd	1.483	0.019	c	0.724	0.013	e	0.128	0.001	b
FS-4	65.779	4.028	d	1.375	0.03	c	2.468	0.016	c	8.954	0.055	d	0.061	0.004	b	1.57	0.003	d	0.754	0.008	f	0.123	0.006	b
TS-1	46.586	5.50411	c	1.271	0.029	b	2.809	0.003	e	11.91	0.051	g	0.07	0.001	d	1.691	0.031	e	0.691	0.034	d	0.126	0.004	b
TS-2	76.54	5.4748	e	1.431	0.013	c	2.855	0.04	e	10.773	0.096	e	0.07	0.002	d	1.557	0.045	d	0.72	0.026	e	0.123	0.005	b
TS-3	91.293	1.184	f	1.783	0.085	d	2.985	0.031	f	11.679	0.158	g	0.068	0.006	cd	1.566	0.059	d	0.578	0.008	b	0.081	0.001	a
TS-4	86.6268	3.051	f	2.079	0.016	e	3.068	0.047	g	11.123	0.08	f	0.073	0.003	d	1.557	0.038	d	0.499	0.005	a	0.081	0.005	a

## Sheet: Figure1 I
CK	Fresh weight above ground	Fresh weight below ground	Root length			Fresh weight above ground	df	Fresh weight below ground	df	Total fresh weight	df	Root-to-root ratio	df	Root length	df
1	0.273	0.225	7		ck	0.3139	0.08344	0.3083	0.06841	0.6222	0.13543	1.0108	0.20268	7.0556	1.46723
2	0.453	0.295	9.5		50	0.4126	0.13629	0.4539	0.15725	0.8664	0.27987	1.1132	0.23751	10.9778	0.94443
3	0.254	0.249	6.5		200	0.1624	0.0361	0.1638	0.04715	0.3262	0.07945	1.0081	0.1581	6.4333	1.5843
4	0.424	0.394	9
5	0.191	0.244	7.5
6	0.271	0.256	5
7	0.307	0.349	6.5
8	0.297	0.371	7
9	0.355	0.392	5.5
FS
1	0.427	0.41	9
2	0.327	0.373	11
3	0.275	0.367	10
4	0.402	0.647	11.5
5	0.378	0.404	11
6	0.411	0.333	12
7	0.329	0.307	11.8
8	0.414	0.465	11
9	0.75	0.779	11.5
TS
1	0.217	0.266	4.8
2	0.11	0.12	6.5
3	0.203	0.17	8.5
4	0.185	0.17	6
5	0.166	0.179	5.5
6	0.131	0.117	8.8
7	0.175	0.183	4.5
8	0.146	0.114	7.8
9	0.129	0.155	5.5

## Sheet: Figure 6 A
ID	CK-1_fpkm	CK-2_fpkm	CK-3_fpkm	CK_average	FS_12h-1_fpkm	FS_12h-2_fpkm	FS_12h-3_fpkm	FS_12h_average	FS_24h-1_fpkm	FS_24h-2_fpkm	FS_24h-3_fpkm	FS_24h_average	FS_48h-1_fpkm	FS_48h-2_fpkm	FS_48h-3_fpkm	FS_48h_average	TS_12h-1_fpkm	TS_12h-2_fpkm	TS_12h-3_fpkm	TS_12h_average	TS_24h-1_fpkm	TS_24h-2_fpkm	TS_24h-3_fpkm	TS_24h-average	TS_48h-1_fpkm	TS_48h-2_fpkm	TS_48h-3_fpkm	TS_48h_average
Cluster-9150.129025	1.99	3.51	2.57	2.69	13.77	2.16	4.06	6.66333	0.75	2.67	0.2	1.20667	0.06	0.43	3.29	1.26	7.59	4.13	17.93	9.88333	56.5	6.7	4.14	22.4467	5.73	12.21	8.65	8.86333
Cluster-9150.129210	6.29	11.03	5.82	7.71333	11.31	13.75	8.87	11.31	7.61	3.35	11.94	7.63333	6.34	3.44	11.73	7.17	19.76	42.14	28.92	30.2733	26.88	27.2	28.56	27.5467	22.3	20.92	13.69	18.97
Cluster-9150.133470	1.3	3.95	3.51	2.92	1.64	1.97	3.21	2.27333	2.61	3.9	2.65	3.05333	1.79	2.72	4.31	2.94	4.88	5.78	3.85	4.83667	13.88	9.44	11.27	11.53	6.65	7.93	6.75	7.11
Cluster-9150.152755	13.31	14.66	13.94	13.97	10.35	17.7	15.5	14.5167	21.11	21.47	22.65	21.7433	17.17	20.42	16.28	17.9567	117.12	137.13	120.26	124.837	71.87	77.72	57.17	68.92	35.36	43	39.19	39.1833
Cluster-9150.155936	10.39	11.37	15.34	12.3667	14.76	24.98	11.14	16.96	12.86	6.77	12.97	10.8667	0.87	2.83	10.54	4.74667	34.44	71.3	57.43	54.39	21.15	33.74	31.35	28.7467	37.16	37.77	22.48	32.47
Cluster-9150.160088	7.13	8.01	9.06	8.06667	17.5	9.19	5.44	10.71	6.33	3.88	12.11	7.44	8.86	8.02	6.74	7.87333	25.67	32.79	35.31	31.2567	37.22	13.59	27.96	26.2567	18.83	25.67	15.03	19.8433
Cluster-9150.168566	8.69	10.51	7.14	8.78	12.36	20.97	11.02	14.7833	9.59	7.71	7.68	8.32667	6.07	2.95	6.82	5.28	26.05	37.56	38.38	33.9967	23.83	29.57	32.38	28.5933	13.94	12.62	15.43	13.9967
Cluster-9150.168756	9.33	10.36	11.5	10.3967	22.02	23.47	13.03	19.5067	8.4	9.1	16.31	11.27	7.56	3.42	6.46	5.81333	45.72	59.48	53.47	52.89	26.16	34.7	48.5	36.4533	30.26	22.49	23.44	25.3967
Cluster-9150.172690	3.01	1.85	1.65	2.17	2.23	2.78	2.77	2.59333	10.54	3.41	12.65	8.86667	12.26	11.17	7.38	10.27	0.72	1.02	0.75	0.83	3.61	3.85	5.79	4.41667	7.06	8.85	8.72	8.21
Cluster-9150.173875	1.23	0.44	0.61	0.76	40.19	40.45	29.78	36.8067	0	1.79	0	0.596667	1.47	0	1.87	1.11333	47.34	47.21	80.89	58.48	11.68	0.42	1.64	4.58	0.73	3.75	0.93	1.80333
Cluster-9150.181507	23.84	19.27	21.63	21.58	21.24	23.97	14.7	19.97	30.4	34.04	36.17	33.5367	31.17	35.7	25.16	30.6767	75.58	204.39	173.76	151.243	108.09	116.7	75.35	100.047	43.04	71.84	68.12	61
Cluster-9150.181595	89.5	69.43	100.57	86.5	90.14	86.67	97.76	91.5233	138.74	113.29	104.45	118.827	180.97	161.33	197.33	179.877	34.3	33.43	29.27	32.3333	44.57	65.96	61.48	57.3367	73.78	85.4	101.4	86.86
Cluster-9150.187751	0	0.93	1.46	0.796667	4.41	0.33	4.4	3.04667	1	0.37	0.35	0.573333	0.76	1.27	0.48	0.836667	93.74	21.01	31.77	48.84	21	0.94	17.04	12.9933	8.31	2.03	3.66	4.66667
Cluster-9150.188108	3.38	4.25	1.83	3.15333	0.38	2.24	0.3	0.973333	45.29	12.34	36.86	31.4967	64.13	147.93	142.73	118.263	4.5	1.05	2.37	2.64	5.03	8.72	4.15	5.96667	44.3	67.73	43.43	51.82
Cluster-9150.188358	11.56	8.16	12.32	10.68	3.76	3.69	0.65	2.7	6.75	9.17	15.96	10.6267	16.57	18.9	14.16	16.5433	20.9	27.54	30.79	26.41	51.74	43.73	52.88	49.45	42.41	66.1	32.28	46.93
Cluster-9150.192402	0	1.13	6.58	2.57	106.82	78.95	89.72	91.83	1.07	1.13	0	0.733333	2.72	1.31	0	1.34333	107.96	118.34	229.5	151.933	23.53	0	5.85	9.79333	3.08	0	2.87	1.98333
Cluster-9150.193638	2.4	2.51	1.64	2.18333	2.68	13.38	5.06	7.04	6.11	0	4.11	3.40667	1.12	2.47	0	1.19667	10.7	21.91	4.89	12.5	19.23	11.05	8.81	13.03	8.55	0	11.91	6.82
Cluster-9150.214291	1.23	3.22	4.94	3.13	0.15	0.77	2.12	1.01333	0.1	0.63	1.15	0.626667	1.25	0.12	0	0.456667	0.59	1.13	0.76	0.826667	24.29	9.89	14.76	16.3133	10.85	9.52	5.08	8.48333
Cluster-9150.214873	0.53	0.87	0.4	0.6	0.67	0.96	0.23	0.62	13.63	4.72	13.61	10.6533	36.83	65.23	38.93	46.9967	0.4	0.25	0.48	0.376667	1.32	0.64	1.33	1.09667	10.72	23.28	15.15	16.3833
Cluster-9150.221356	3.44	13.91	17.84	11.73	1.74	0.3	1.41	1.15	2.44	4.73	0.35	2.50667	0.63	0.32	0	0.316667	4.81	1.93	3.42	3.38667	79.63	29.25	43.1	50.66	20.4	33.67	15.62	23.23
Cluster-9150.22812	0	0.67	2.38	1.01667	2.2	1.97	27.17	10.4467	8.78	23.19	3.42	11.7967	16.53	0	6.03	7.52	10.82	14.6	30.73	18.7167	6.64	0	14.48	7.04	0	0.85	0	0.283333
Cluster-9150.261537	12.86	10.98	10.1	11.3133	35.86	19.87	27.15	27.6267	3.65	11.34	8.45	7.81333	9.84	4.37	9.86	8.02333	24.41	39.15	51.49	38.35	11.05	16.11	21.85	16.3367	6.86	22.81	13.81	14.4933
Cluster-9150.270952	2.89	5.6	1.7	3.39667	10.14	9.27	11.16	10.19	0	0.24	0.54	0.26	0.44	1.09	0.08	0.536667	3.49	11.75	10.23	8.49	1.82	2.53	2.63	2.32667	6.39	3.91	4.89	5.06333
Cluster-9150.297970	1.09	5.28	7.09	4.48667	1.1	0.31	2.95	1.45333	0.32	1.99	0.74	1.01667	1	0	1.11	0.703333	1.81	0.68	0.33	0.94	43.09	18.58	22.19	27.9533	10.77	15.26	8.24	11.4233
Cluster-9150.49515	0.45	2.85	2.18	1.82667	3.27	6.31	6.53	5.37	2.04	1.7	3.09	2.27667	1.87	5.51	2.89	3.42333	31.08	8.74	7.96	15.9267	10.98	1.63	5.08	5.89667	4.62	3.3	2.57	3.49667

## Sheet: Figure6 B
ID	CK-1_fpkm	CK-2_fpkm	CK-3_fpkm	CK-average	FS_12h-1_fpkm	FS_12h-2_fpkm	FS_12h-3_fpkm	FS_12h_average	FS_24h-1_fpkm	FS_24h-2_fpkm	FS_24h-3_fpkm	FS_24h_average	FS_48h-1_fpkm	FS_48h-2_fpkm	FS_48h-3_fpkm	FS_48h_average	TS_12h-1_fpkm	TS_12h-2_fpkm	TS_12h-3_fpkm	TS_12h_average	TS_24h-1_fpkm	TS_24h-2_fpkm	TS_24h-3_fpkm	TS_24h_average	TS_48h-1_fpkm	TS_48h-2_fpkm	TS_48h-3_fpkm	TS_48h_average
Cluster-9150.102937	0	4.26	2.51	2.25667	2.35	35.76	3.14	13.75	4.19	7.84	6.23	6.08667	3.46	20.08	9.2	10.9133	29.9	162.87	153.89	115.553	210.42	45.1	205.95	153.823	9.81	31.36	20.14	20.4367
Cluster-9150.106349	0.63	2.52	1.12	1.42333	0.52	0.22	0.74	0.493333	1.3	4.15	0.47	1.97333	4.28	50.54	23.4	26.0733	10.13	8.56	6.24	8.31	20.87	9.15	40.24	23.42	3.66	3.4	1.22	2.76
Cluster-9150.114995	1.06	1.04	0.2	0.766667	0.1	1.82	0	0.64	0	0.05	0.1	0.05	0.14	0.71	0.26	0.37	3.93	22.93	1.11	9.32333	2.71	3.38	1.92	2.67	0.3	0.1	0.75	0.383333
Cluster-9150.125167	1.28	0	1.2	0.826667	14.38	3.22	15.02	10.8733	1.52	6.27	0.62	2.80333	0.01	3.37	2.87	2.08333	35.64	9.58	2.04	15.7533	11.87	0.4	3.14	5.13667	7.64	10.36	0	6
Cluster-9150.126983	4.95	9.98	2.58	5.83667	0.77	0.14	0.72	0.543333	3.26	3.53	3.31	3.36667	13.08	132.06	20.43	55.19	40.56	47.79	23.25	37.2	54.52	24.61	60.43	46.52	4.67	17.91	16.85	13.1433
Cluster-9150.135267	1.63	1.8	1.53	1.65333	1.08	11.64	0.87	4.53	2.15	1.32	1.6	1.69	0.34	0	0.18	0.173333	11.3	34.93	19.24	21.8233	97.96	32.5	27.04	52.5	3.65	2.83	34.81	13.7633
Cluster-9150.148033	6.86	16	10.27	11.0433	0.9	0.51	0	0.47	2.73	8.34	4.1	5.05667	25.01	86.75	42.21	51.3233	75.15	50.69	48.16	58	71.2	37.16	98.12	68.8267	7.86	55.91	29.04	30.9367
Cluster-9150.149349	5.83	11.87	6.95	8.21667	4.64	7.66	3.47	5.25667	4.56	4.32	11.15	6.67667	14.39	4.4	8.79	9.19333	20	20.17	21.58	20.5833	20.9	20.47	17.81	19.7267	12.61	11.11	8.8	10.84
Cluster-9150.151114	105.04	122.13	134.51	120.56	157.32	158.66	89.51	135.163	34.57	37.35	91.09	54.3367	126.91	68.35	55.86	83.7067	1070.53	1072.19	771.3	971.34	709.72	875.97	712.86	766.183	433.57	396.41	510.6	446.86
Cluster-9150.152755	13.31	14.66	13.94	13.97	10.35	17.7	15.5	14.5167	21.11	21.47	22.65	21.7433	17.17	20.42	16.28	17.9567	117.12	137.13	120.26	124.837	71.87	77.72	57.17	68.92	35.36	43	39.19	39.1833
Cluster-9150.160933	32.93	50.21	63.73	48.9567	87.85	76.05	61.22	75.04	42.54	83.71	45.53	57.26	61.96	37.81	72.66	57.4767	115.84	111.35	117.27	114.82	226.07	65.26	147.18	146.17	41.09	58.78	55.54	51.8033
Cluster-9150.170037	5.9	3.87	4.58	4.78333	4.37	3.91	4.7	4.32667	3.51	2.51	0.63	2.21667	6.44	1.97	1.34	3.25	13.21	13.5	9.59	12.1	18.11	16.07	18.47	17.55	18.76	21.27	3.16	14.3967
Cluster-9150.170282	6.32	7.36	8.55	7.41	30.92	34.6	15.52	27.0133	9.19	6.1	18.26	11.1833	17.79	12.81	8.02	12.8733	18.26	43.21	42.41	34.6267	36.27	12	35.04	27.77	18.5	6.3	26.53	17.11
Cluster-9150.172609	6.29	7.5	8.09	7.29333	12.56	27.62	8.5	16.2267	3.67	6.76	7.4	5.94333	2.77	6.39	3.25	4.13667	20.23	32.85	27.81	26.9633	71.07	29.02	32.24	44.11	11.57	8.18	18.59	12.78
Cluster-9150.173875	1.23	0.44	0.61	0.76	40.19	40.45	29.78	36.8067	0	1.79	0	0.596667	1.47	0	1.87	1.11333	47.34	47.21	80.89	58.48	11.68	0.42	1.64	4.58	0.73	3.75	0.93	1.80333
Cluster-9150.175951	15	10.92	9.18	11.7	15.62	16.83	11.3	14.5833	6.34	4.99	10.63	7.32	13.68	5.07	8.48	9.07667	129.97	88.23	88.76	102.32	81.19	78.3	61.93	73.8067	26.22	26.52	35.89	29.5433
Cluster-9150.176202	815.16	769.93	715.99	767.027	1419.97	2070.08	1566.84	1685.63	942.65	978.04	1012.87	977.853	492.77	333.36	502.51	442.88	2158.11	1482.79	2429.12	2023.34	1656.07	1717.42	1371.53	1581.67	1253.1	1233.63	1143.08	1209.94
Cluster-9150.176216	263.28	336.75	170.01	256.68	625.45	1271.21	773.78	890.147	472.71	262.04	311.08	348.61	82.28	150.36	102.54	111.727	1956.22	1149.53	2519.94	1875.23	1108.99	887.18	587	861.057	358.3	388.66	742.16	496.373
Cluster-9150.176217	50.56	93.77	20.73	55.02	12.1	320.71	78.52	137.11	59.88	4.55	0	21.4767	1.88	54.41	22.17	26.1533	696.93	74.16	944.04	571.71	334.59	279.89	123.81	246.097	0	58.69	259.51	106.067
Cluster-9150.176218	130.66	126.49	143.42	133.523	435.97	594.21	540.64	523.607	280.66	254.66	257.69	264.337	73.13	57.45	73	67.86	468.74	631.59	508.22	536.183	389.61	335.63	255.34	326.86	283.95	261.19	179.56	241.567
Cluster-9150.177494	29.97	26.28	28.26	28.17	22.62	25.76	11.5	19.96	26.89	18.15	43.09	29.3767	17.48	22.19	24.52	21.3967	74.96	60.19	61.8	65.65	57.91	89.23	61.34	69.4933	56.24	47.83	63.61	55.8933
Cluster-9150.178414	8242.38	10396.9	12924.1	10521.1	20474.8	25797.1	21112.5	22461.5	13675.5	17558.4	25143.5	18792.5	16845.8	9814.3	13006.1	13222.1	57360.1	44922.2	50988.1	51090.1	65942.5	41288.9	42568.9	49933.4	39081.2	45535.2	46039.3	43551.9
Cluster-9150.178825	2.46	4.67	7.83	4.98667	13.03	21.78	6.39	13.7333	1.73	2.54	4.46	2.91	2	0.26	3.62	1.96	14.83	23.67	26.18	21.56	71.16	17.22	25.34	37.9067	7.29	2.21	14.8	8.1
Cluster-9150.181507	23.84	19.27	21.63	21.58	21.24	23.97	14.7	19.97	30.4	34.04	36.17	33.5367	31.17	35.7	25.16	30.6767	75.58	204.39	173.76	151.243	108.09	116.7	75.35	100.047	43.04	71.84	68.12	61
Cluster-9150.182081	113.27	98.49	55.5	89.0867	73.75	115.9	41.65	77.1	145.91	81.5	142.54	123.317	68.31	146.32	104.13	106.253	184.38	262.14	184.89	210.47	171.21	189.27	136.58	165.687	147.48	136.6	143.52	142.533
Cluster-9150.185919	18.95	23.13	16.33	19.47	25.9	37.39	25.72	29.67	26.61	21.18	26.48	24.7567	15.27	15.9	12.47	14.5467	67.75	66.35	76.92	70.34	61.14	55.6	50.09	55.61	51.01	44.27	42.47	45.9167
Cluster-9150.187399	47.87	50.3	53.78	50.65	75.34	87.26	39.98	67.5267	30.97	30.39	37.05	32.8033	45.83	27.63	33.2	35.5533	527.47	510.08	366.63	468.06	341.92	389.61	294.86	342.13	170.34	164.57	214.75	183.22
Cluster-9150.187432	1.18	0	2.06	1.08	13.01	14.04	15.53	14.1933	5.89	5.32	7.98	6.39667	7.84	3.95	0	3.93	16.72	6.35	9.52	10.8633	14.54	2.05	0	5.53	8.72	11.13	0	6.61667
Cluster-9150.187751	0	0.93	1.46	0.796667	4.41	0.33	4.4	3.04667	1	0.37	0.35	0.573333	0.76	1.27	0.48	0.836667	93.74	21.01	31.77	48.84	21	0.94	17.04	12.9933	8.31	2.03	3.66	4.66667
Cluster-9150.192402	0	1.13	6.58	2.57	106.82	78.95	89.72	91.83	1.07	1.13	0	0.733333	2.72	1.31	0	1.34333	107.96	118.34	229.5	151.933	23.53	0	5.85	9.79333	3.08	0	2.87	1.98333
Cluster-9150.193638	2.4	2.51	1.64	2.18333	2.68	13.38	5.06	7.04	6.11	0	4.11	3.40667	1.12	2.47	0	1.19667	10.7	21.91	4.89	12.5	19.23	11.05	8.81	13.03	8.55	0	11.91	6.82
Cluster-9150.197901	4.04	5.93	5.07	5.01333	6.67	8.28	7.88	7.61	3.34	5.62	7.2	5.38667	3.48	7.36	4.49	5.11	21.19	24.73	16.46	20.7933	18.97	13.26	19.12	17.1167	10.33	9.59	8.44	9.45333
Cluster-9150.199437	6.35	7.44	12.43	8.74	16.33	36.16	7.02	19.8367	7.88	7.09	8.02	7.66333	5.32	6.07	7.61	6.33333	51.87	97.36	68.69	72.64	92.29	45.98	57.33	65.2	13.86	18.66	20.58	17.7
Cluster-9150.204323	9.35	10.88	5.8	8.67667	26.11	23.13	15.97	21.7367	11.03	5.25	12.1	9.46	7.8	7.85	4.42	6.69	24.43	45.33	52.36	40.7067	16.83	15.99	17.51	16.7767	10.17	11.82	16.06	12.6833
Cluster-9150.212388	1.33	2.11	2.95	2.13	1.63	0.51	1.15	1.09667	1.11	1.21	1.47	1.26333	4.14	22.72	6.1	10.9867	12.14	11.59	10.59	11.44	12.08	4.56	14.23	10.29	2.18	7.47	3.7	4.45
Cluster-9150.220133	0	0.12	0.5	0.206667	0.51	3.75	0.06	1.44	0	0.42	0.79	0.403333	0	0.2	0.88	0.36	5.72	13.06	1.97	6.91667	27.85	1.67	6.44	11.9867	0.65	0.29	0.99	0.643333
Cluster-9150.240745	6.85	4.99	3.82	5.22	4.51	11.52	9.74	8.59	2.64	2.44	7.78	4.28667	0.74	0.14	13.47	4.78333	35.72	151.47	97	94.73	73.07	64.25	27.54	54.9533	4.47	15.38	19.98	13.2767
Cluster-9150.248364	13.36	18.69	12.74	14.93	27.1	28.86	22.32	26.0933	17.13	12.54	19.28	16.3167	12.93	13.9	16.31	14.38	36.52	33.02	38.63	36.0567	23.68	24.53	18.44	22.2167	21.76	28.78	15.24	21.9267
Cluster-9150.256800	3.94	2.94	2.9	3.26	2.09	2.54	3.83	2.82	1.74	1.47	3.48	2.23	4.06	2.08	2.1	2.74667	9.71	8.55	7.65	8.63667	1.97	6.81	3.95	4.24333	2.95	5.03	4.57	4.18333
Cluster-9150.261537	12.86	10.98	10.1	11.3133	35.86	19.87	27.15	27.6267	3.65	11.34	8.45	7.81333	9.84	4.37	9.86	8.02333	24.41	39.15	51.49	38.35	11.05	16.11	21.85	16.3367	6.86	22.81	13.81	14.4933
Cluster-9150.281242	3.62	1.35	2.46	2.47667	7.82	7.31	7.84	7.65667	5.43	2.61	3.86	3.96667	7.62	3.43	5.43	5.49333	12.11	12.26	8.47	10.9467	1.39	5.38	2.38	3.05	2.72	6.61	2.74	4.02333
Cluster-9150.28921	0.13	0	0.81	0.313333	0	4.39	0	1.46333	0	0	0.14	0.0466667	0	0	0	0	10.61	21.17	11.68	14.4867	6.59	4.71	1.35	4.21667	0	0	0.53	0.176667
Cluster-9150.289219	12.6	8.46	10.58	10.5467	8.67	6.33	6.24	7.08	1.68	7.73	6.61	5.34	4.64	0.22	13.18	6.01333	14.34	21.51	18.55	18.1333	10.61	4.02	12.73	9.12	8.22	12.37	17.11	12.5667
Cluster-9150.323613	2.46	5.04	4.36	3.95333	6.19	7.26	3.3	5.58333	3.05	4.6	3.29	3.64667	5.08	7.53	4.01	5.54	13.25	10.49	9.83	11.19	8.48	7.28	8.58	8.11333	6.63	13.07	4.18	7.96
Cluster-9150.49515	0.45	2.85	2.18	1.82667	3.27	6.31	6.53	5.37	2.04	1.7	3.09	2.27667	1.87	5.51	2.89	3.42333	31.08	8.74	7.96	15.9267	10.98	1.63	5.08	5.89667	4.62	3.3	2.57	3.49667
Cluster-9150.77564	13.26	27.56	7.45	16.09	31.61	31.91	18.62	27.38	3.77	6.51	2.38	4.22	9.56	4.27	6.06	6.63	62.19	53.26	53.51	56.32	38.79	21.44	25.23	28.4867	10.41	10.56	6.55	9.17333
